# Supplementary material for: VAR2CSA Signatures of High Plasmodium falciparum Parasitemia in the Placenta
Source: PubMed Central journal article supplement (PMC3723727; doi:10.1371/journal.pone.0069753), 2013-07-25

**A.**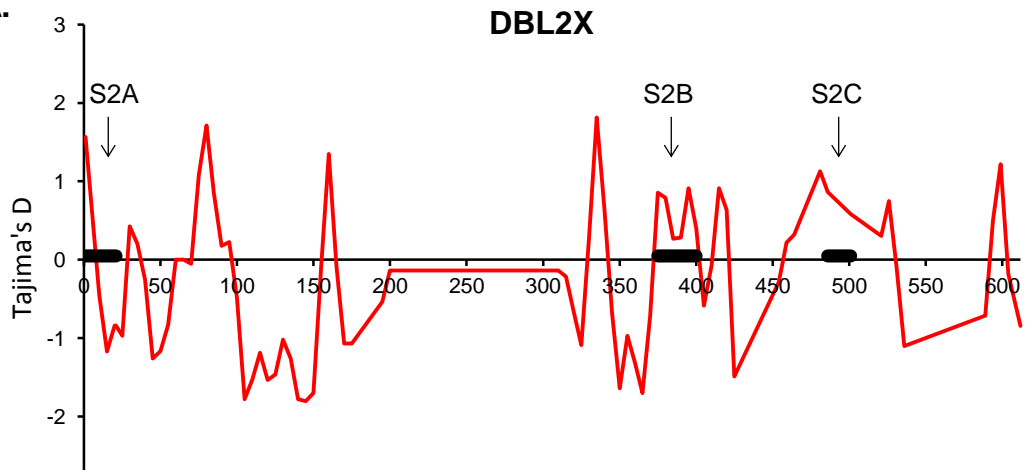**B.**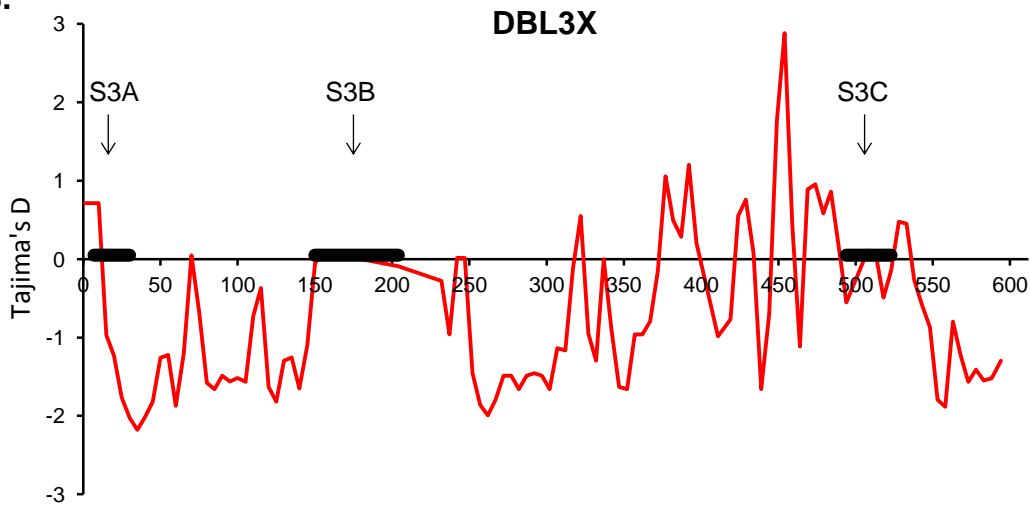

Supplement: pone.0069753.s001.pdf [file pone.0069753.s001.pdf]
